# Supplementary material for: Enhanced electromagnetic wave absorption and mechanical performances of graphite nanosheet/PVDF foams via ice dissolution and normal pressure drying
Source: Royal Society of Chemistry journal article supplement (doi:10.1039/d4tc00929k), 2024-01-01
Supplement: d4tc00929k1.pdf [file d4tc00929k1.pdf]

**Enhanced electromagnetic wave absorption and mechanical performances of  
graphite nanosheet/ PVDF foams via ice dissolution and normal pressure drying**

Xiaogang Su<sup>a\*</sup>, Yu Zhang<sup>a</sup>, Jun Wang<sup>a</sup>, Yaqing Liu<sup>a\*</sup>

a. Key Laboratory of Functional Nanocomposites of Shanxi Province, School of  
Materials Science and Engineering, North University of China, Taiyuan, 030051, China

## Preparation of GNS

Expanded graphite with a diameter of 200 mesh was selected as the raw material and treated in a high temperature furnace at 950°C for 15 s to obtain volumetric fluffy expanded graphite. Subsequently, 1 g of expanded graphite was placed in 500 mL of a mixture of 85:15 ethanol and water and sonicated for 10 h. Next, the mixture was filtered and the wet material was obtained, and then the ultrasonic dispersion was continued in a mixture of tert-butanol and water, where the proportion of tert-butanol was 30%. Finally, the desired graphene nanosheets were obtained after 48 h of freeze-drying.

## Calculation of impedance matching

$$|\Delta| = \left| \sinh^2(Kfd) - M \right| \quad (1)$$

$$M = \frac{4\mu' \cos \delta_e \varepsilon' \cos \delta_m}{(\mu' \cos \delta_e - \varepsilon' \cos \delta_m)^2 + \left[ \tan\left(\frac{\delta_m - \delta_e}{2}\right) \right]^2 (\mu' \cos \delta_e + \varepsilon' \cos \delta_m)^2} \quad (2)$$

$$K = \frac{4\pi \sqrt{\varepsilon' \mu'} \sin \frac{\delta_e + \delta_m}{2}}{c \cdot \cos \delta_e \cdot \cos \delta_m} \quad (3)$$

## Calculation of total loss capacity

$$\alpha = \frac{\pi f}{c} \left( \left( \mu'' \varepsilon'' - \mu' \varepsilon' + \left( (\mu'^2 + \mu''^2)(\varepsilon'^2 + \varepsilon''^2) \right)^{1/2} \right) \right)^2 \quad (4)$$

$$\alpha_T = \sum_2^{18} \alpha_f \quad (5)$$

Here,  $\alpha_f$  is loss capacity at f frequency, and  $\alpha_T$  is total loss capacity in the range of 2-18 GHz.

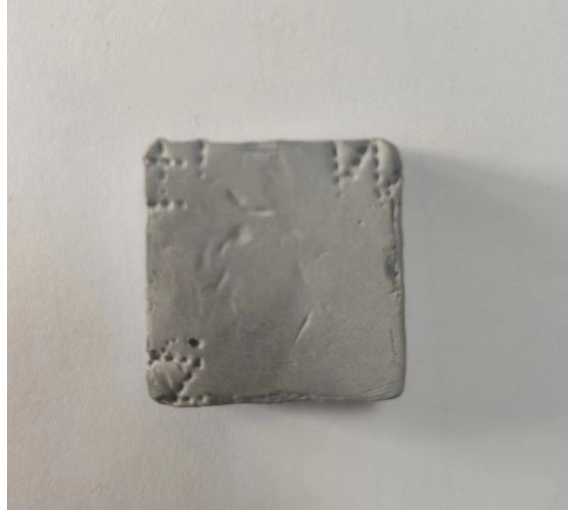

**Figure S1.** The digital image of foam

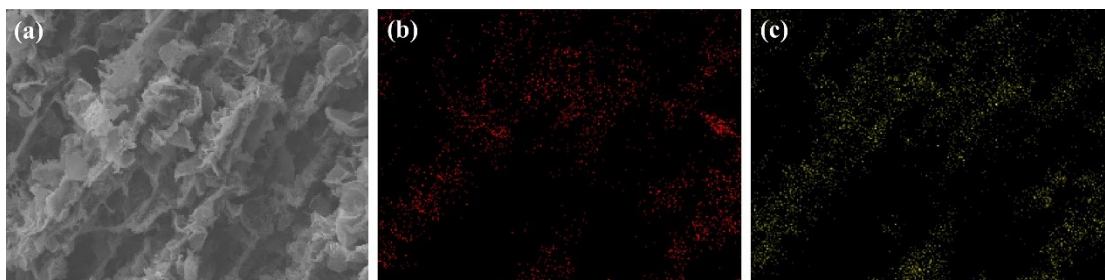

**Figure S2.** Results of EDS for PG-3. (a) Original diagram, (b) Carbon element, (c)

Fluorine element.

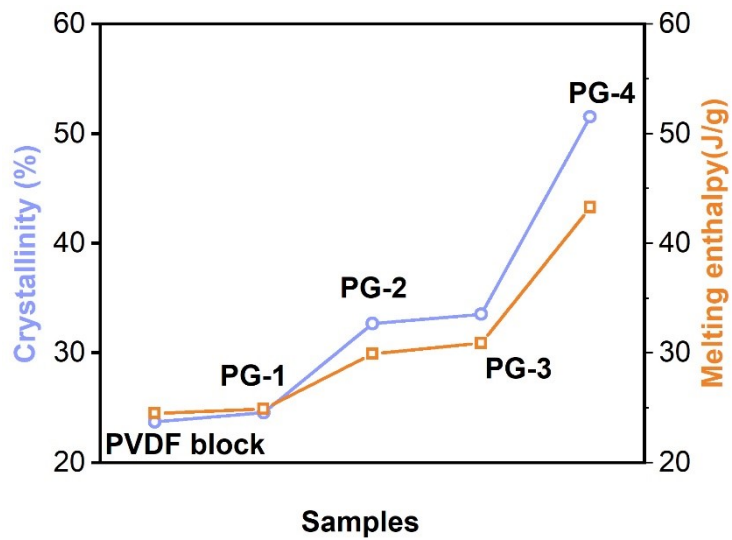

**Figure S3.** Crystallinity and melting enthalpy of PVDF block, PG-1, PG-2, PG-3, and PG-4

$$x_c = \frac{\Delta H}{\Delta H_0 \times W_f} \times 100\%$$

$\Delta H_0$  is the enthalpy of melting of 100% crystallized PVDF,  $\Delta H_0=105$  J/g;  $\Delta H$  is the enthalpy of melting required for actual crystallization of the sample;  $W_f$  is the proportion of a substance in the mixture.

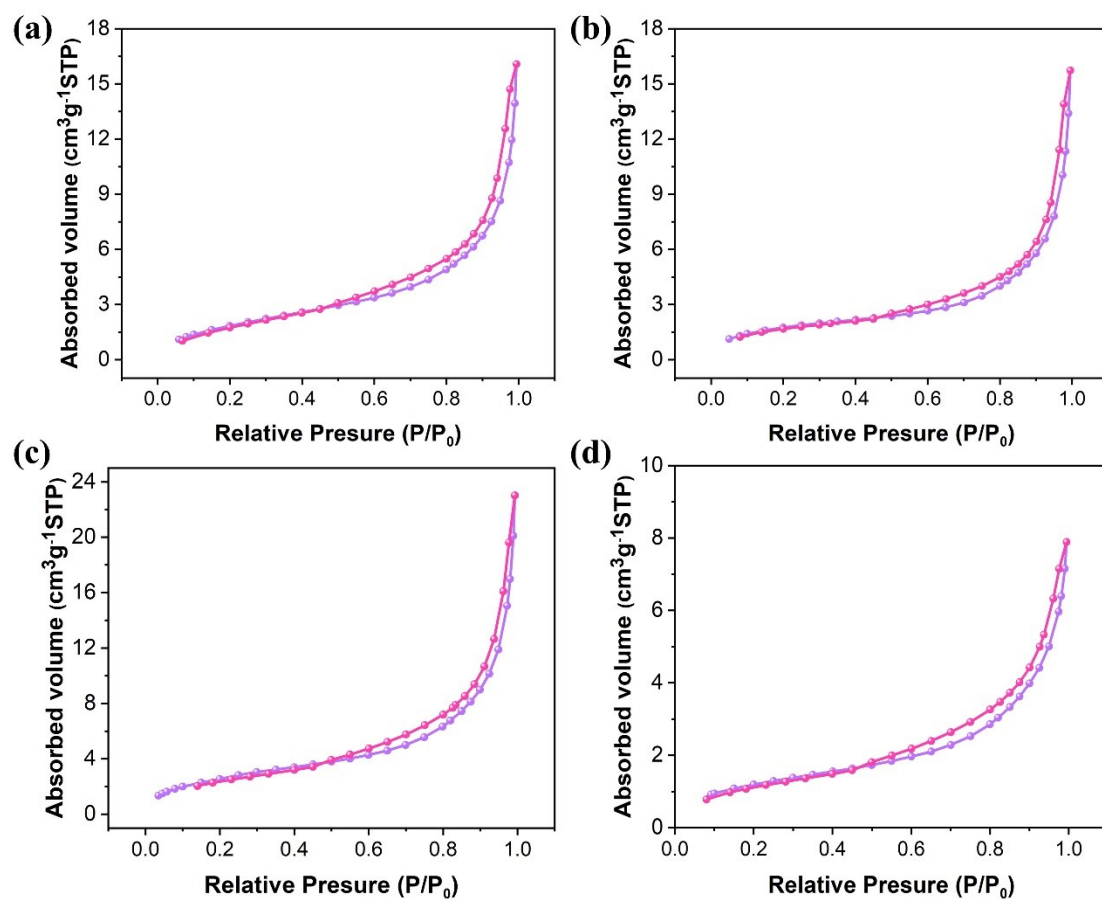

**Figure S4.** (a-d) The nitrogen isothermal adsorption and desorption curves of PG-1, PG-2, PG-3, and PG-4.

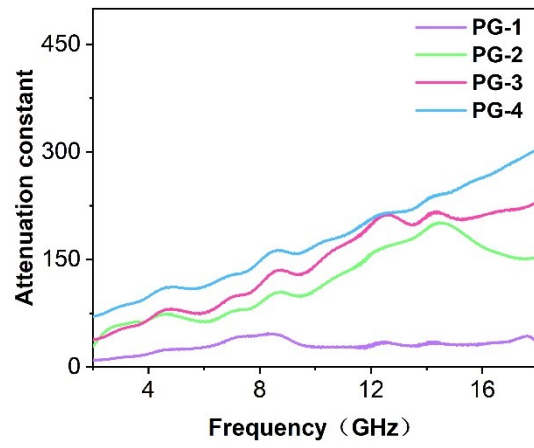

**Figure S5.** The curves of attenuation constant for four samples

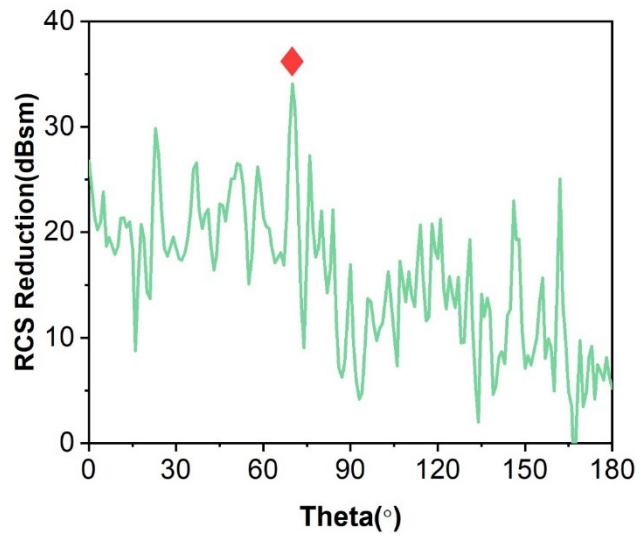

**Figure S6.** RCS reduction at the incidence angle in the range of  $0^\circ$  to  $180^\circ$ .



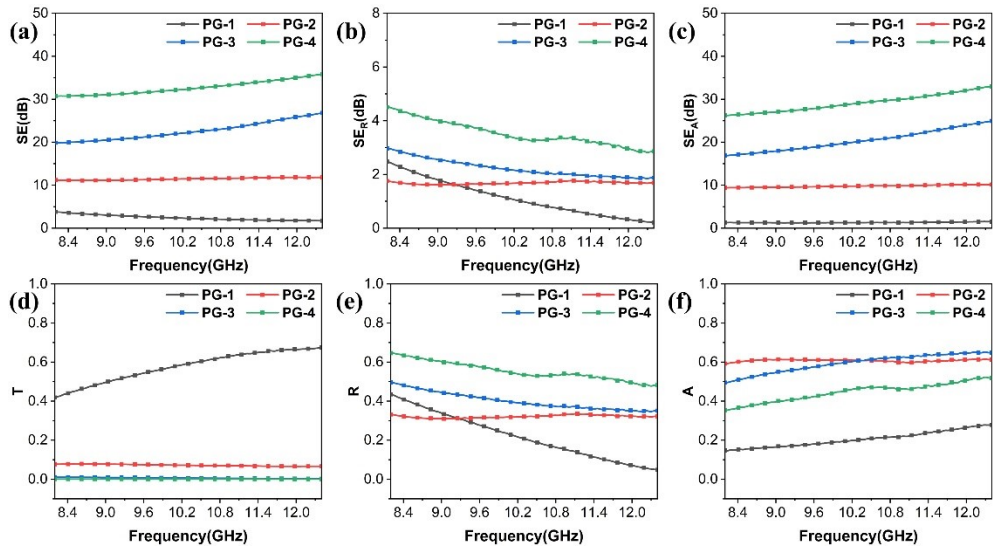

**Figure S7.** (a-f) SE, SE<sub>R</sub>, SE<sub>A</sub>, T, R and A of PG-x foams

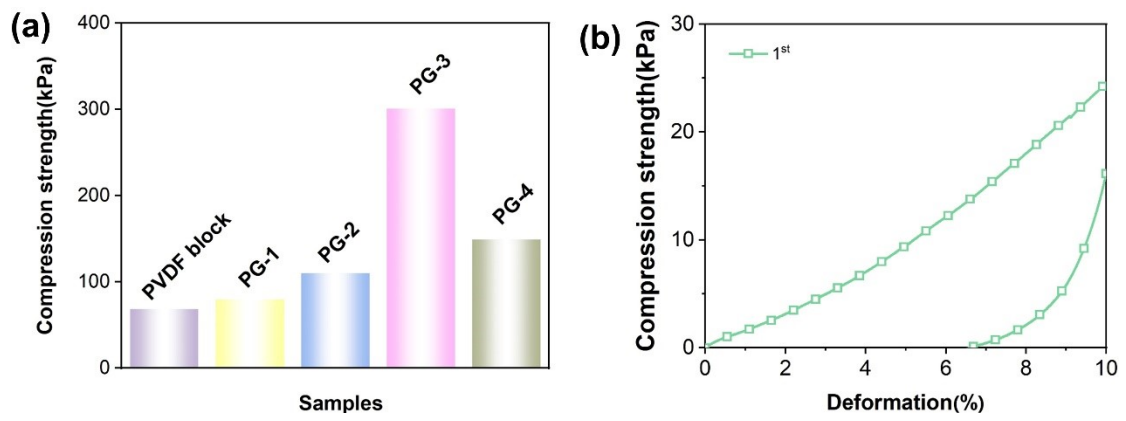

**Figure S8.** (a) Maximum compressive strength of deformation of 15%; (b) Curve of a cycle
